# Supplementary material for: Pectin oligosaccharides from sugar beet pulp: molecular characterization and potential prebiotic activity
Source: Royal Society of Chemistry journal article supplement (doi:10.1039/c7fo01182b), 2018-01-01
Supplement: c7fo01182b1.xlsx [file c7fo01182b1.xlsx]

## Sheet: Foglio1
	Semiquantification values: area of each compound divided by the total area of all the identified compounds
ID	Ara2	Ara3	Ara4	Ara6	Ara7	Ara8	Ara9	Ara10	GalA2Rha1	GalA2Rha2	GalA2Rha2OAc	GalA3Rha2	GalA3Rha3	GalA3Rha3OAc	GalA4Rha2	GalA3	GalA4	GalA4Oac	GalA4OMe	GalA4OMeOAc	GalA5OMe	GalA5OMe2	GalA5OMe2OAc	GalA5OMeOAc	GalA6OMe2OAc	GalA7OMe2	UGalA4OMe	UGalA4OMe2OAc	UGalA5OMe2	UGalA5OMe2OAc	UGalA5OMe3OAc
Enz_10k_0.6U<400	22.1879	5.98474	8.20423	9.54789	5.73761	6.34415	3.02954	0.145207	16.8475	0.128728	1.80327	10.1552	0.0564504	0.105071	0.0968669	0.110911	0.0233633	0.0286497	0.415368	5.68914	0.0720318	0.0489552	0.109668	0.0343757	0.106282	0.0755569	0.715295	0.265072	0.0875632	0.0426468	1.8007
Enz_10k_0.6U_400-700	35.4042	7.95959	15.1828	6.23949	6.80905	0.782271	3.50298	0.141471	13.0637	0.245041	0.428558	3.7008	0.095497	0.29013	0.157727	0.0994732	0.127941	0.282082	0.0968246	0.946081	0.186445	0.246081	0.130576	0.080659	0.124429	0.345267	0.281928	0.360641	0.103311	0.109028	2.47589
Enz_10k_0.6U_700-1000	10.5069	4.28886	7.57423	16.1832	7.79007	6.95874	3.90096	1.14179	30.5621	1.175	1.08606	5.55355	0.0258203	0.0382352	0.0387024	0.027176	0.00713207	0.0129534	0.0310611	0.736062	0.0200664	0.0119499	0.0135368	0.0114319	0.0301049	0.0239577	0.411835	1.18584	0.015347	0.00908721	0.628266
Enz_10k_0.6U_1000-5000	3.80318	2.8471	1.30293	14.3765	7.08623	6.11828	4.01635	1.38711	37.2316	1.9552	1.68311	13.3908	0.0306223	0.357648	0.0205909	0.0132557	0.0069042	0.00538862	0.0230832	0.4106	0.00832497	0.00736459	0.00803061	0.00474421	0.00533593	0.0235896	0.652182	1.87281	0.0822855	0.684817	0.583966
Enz_10k_0.6U_5000-10000	0.316801	1.92451	0.369111	5.29295	2.87254	2.70959	1.35195	0.69192	32.989	3.04958	4.15748	28.0153	0.759521	1.69189	0.0106612	0.095342	0.00882777	0.0117627	0.285764	0.830288	0.170329	0.0177841	0.469415	0.0084934	0.0225806	0.725865	1.18218	5.39624	0.200655	2.35467	2.01699
Nit_10k_0.6U<400	50.0222	22.6408	9.50185	4.78339	2.6691	2.67928	0.162666	0.0526236	2.79008	0.748893	0.123478	1.08259	0.065769	0.0336821	0.030447	0.0186652	0.0748152	0.0338934	0.823436	1.15573	0.0566845	0.0218103	0.0372255	0.0164214	0.0552409	0.0479503	0.0783401	0.0359494	0.0484127	0.0342714	0.0743291
Nit_10k_0.6U_400-700	54.7488	19.423	6.84214	4.17325	1.93378	0.709194	0.0491374	0.03642	6.43166	1.74825	0.0490811	2.14065	0.299257	0.0548983	0.0240142	0.0504736	0.0669382	0.0306986	0.0541595	0.764857	0.0206453	0.0229651	0.0140643	0.0297838	0.0409603	0.0301477	0.0702754	0.0575902	0.0146341	0.0393659	0.0288358
Nit_10k_0.6U_700-1000	18.1999	14.6936	10.8229	10.7303	5.02196	2.73047	0.518337	0.101757	21.8257	5.22915	0.558671	4.70201	0.29982	0.136363	0.0117564	0.3362	0.0113347	0.0145018	0.0196835	1.42055	0.00373817	0.00277458	0.272563	0.00519789	0.00339286	0.149368	0.320997	1.57342	0.00626056	0.266954	0.0103847
Nit_10k_0.6U_1000-5000	10.1753	10.0833	10.1394	12.3843	6.52417	3.5891	0.685079	0.0939203	21.0447	5.46377	0.677656	9.85818	0.877819	0.18404	0.207095	1.75262	0.0642262	0.0156995	0.261364	1.93359	0.00722975	0.00333242	0.882867	0.00607491	0.00244502	0.333971	0.604589	1.79468	0.00206601	0.333809	0.013653
Nit_10k_0.6U_5000-10000	1.91947	1.99076	1.7085	1.89805	0.990786	0.704973	0.192003	0.0102165	18.2869	9.18435	1.13272	32.423	4.25272	0.752033	2.50341	2.27557	0.88698	0.730829	0.807591	4.57542	0.341602	0.215787	4.77359	0.718516	0.278803	1.78241	1.30224	2.32113	0.0114712	1.02309	0.00505541
Nit_5k_3U<400	39.4026	30.4638	8.76508	7.03899	3.75918	3.11018	0.722986	0.0418426	4.54042	0.0765781	0.0926104	1.16002	0.121721	0.0344728	0.0604323	0.0280027	0.0459066	0.0614414	0.0221246	0.122916	0.0165205	0.018698	0.0113686	0.0338606	0.0102187	0.0442697	0.0392767	0.0931675	0.0234703	0.0198912	0.0180161
Nit_5k_3U_400-700	26.4256	15.2331	4.28486	2.92329	1.09621	0.0262275	0.0987253	0.0430357	46.4843	0.029732	0.0460796	2.44981	0.0845379	0.0456258	0.0424392	0.0298306	0.0130784	0.02115	0.0544677	0.311117	0.0149616	0.00853666	0.0246384	0.00668347	0.0185906	0.0222645	0.0580999	0.0350591	0.0188049	0.0250715	0.0241325
Nit_5k_3U_700-1000	14.7576	13.6311	9.50252	12.5902	8.22148	6.23068	1.78854	0.498354	19.4907	1.71924	0.906045	5.48011	0.198144	0.248423	0.12785	0.514939	0.00495032	0.528628	0.0601084	1.60245	0.00294975	0.00411482	0.110148	0.00258005	0.00377315	0.325485	0.123149	1.07694	0.00383139	0.111153	0.133767
Nit_5k_3U_1000-5000	5.32911	4.39016	2.20561	6.77827	4.55065	3.89576	1.54107	0.38033	20.4869	4.02695	1.98443	17.2125	1.43162	0.852234	1.53337	0.485973	0.180647	0.62966	0.742612	12.7152	0.0258792	0.123139	1.16983	0.818789	0.451746	1.02993	1.5697	2.21046	0.00714325	0.876377	0.363939
